# Supplementary material for: Comprehensive analysis of histone post-translational modifications in mouse and human male germ cells
Source: PubMed Central journal article supplement (PMC4915177; doi:10.1186/s13072-016-0072-6), 2016-06-21

## Additional file 2

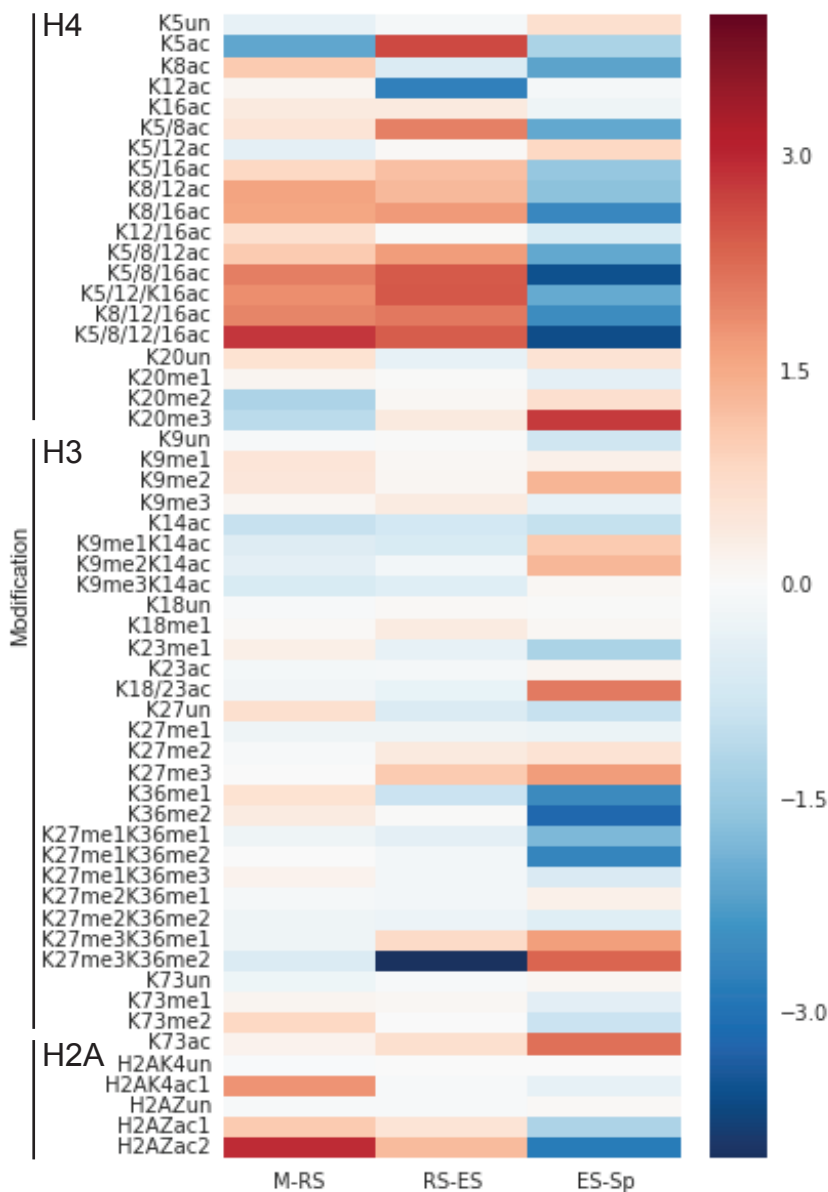

Supplement: 13072_2016_72_MOESM2_ESM.pdf [file 13072_2016_72_MOESM2_ESM.pdf]
